# Supplementary material for: Ferrocene-based polyethyleneimines for burning rate catalysts
Source: Royal Society of Chemistry journal article supplement (doi:10.1039/c5nj03171k), 2016-01-01
Supplement: c5nj03171k1.pdf [file c5nj03171k1.pdf]

## Supporting Information

### Ferrocene-based Polyethyleneimines for Burning Rate Catalysts

Zain-ul-Abdin, Li Wang\*, Haojie Yu\*, Muhammad Saleem, Muhammad Akram, Nasir M. Abbasi, Hamad

Khalid, Ruoli Sun, and Yongsheng Chen

State Key Laboratory of Chemical Engineering, College of Chemical and Biological Engineering,

Zhejiang University, Hangzhou 310027, China

#### Table of Figures

|                                                                                                                                                                                        |    |
|----------------------------------------------------------------------------------------------------------------------------------------------------------------------------------------|----|
| Figure S 1. <sup>1</sup> H NMR spectra of PEI, and PEI-Fcs. ....                                                                                                                       | S3 |
| Figure S 2. UV-Vis spectra of PEI-Fcs: (a) PE-Fc-1, (b) PE-Fc-2, (c) PE-Fc-3, (d) PE-Fc-4, (e) PE-Fc-5 and (f) PE-Fc-6. ....                                                           | S5 |
| Figure S 3. CV curves of PEI-Fc-1 in: (a) DCM, (b) CHCl <sub>3</sub> , (c) THF, (d) DMF, (e) DMSO at different scan rate (V/s), and (f) different organic solvents at 0.1 V/s.....     | S5 |
| Figure S 4. CV curves of PEI-Fc-2 in: (a) DCM, (b) CHCl <sub>3</sub> , (c) THF, (d) DMF, (e) DMSO at different scan rate (V/s), and (f) different organic solvents at 0.1 V/s.....     | S6 |
| Figure S 5. CV curves of the PEI-Fc-3 in: (a) DCM, (b) CHCl <sub>3</sub> , (c) THF, (d) DMF, (e) DMSO at different scan rate (V/s), and (f) different organic solvents at 0.1 V/s..... | S6 |
| Figure S 6. CV curves of the PEI-Fc-4 in: (a) DCM, (b) CHCl <sub>3</sub> , (c) THF, (d) DMF, (e) DMSO at different scan rate (V/s), and (f) different organic solvents at 0.1 V/s..... | S7 |
| Figure S 7. CV curves of PEI-Fc-5 in: (a) DCM, (b) CHCl <sub>3</sub> , (c) THF, (d) DMF, (e) DMSO at different scan rate (V/s), and (f) different organic solvents at 0.1 V/s.....     | S7 |
| Figure S 8. CV curves of PEI-Fc-6 in: (a) DCM, (b) CHCl <sub>3</sub> , (c) THF, (d) DMF, (e) DMSO at different scan rate (V/s), and (f) different organic solvents at 0.1 V/s.....     | S8 |
| Figure S 9. Migration photos of: (a) PEI-Fc-1, (b) PEI-Fc-4, (c) PEI-Fc-6, (d) catocene and (e) ferrocene on first day, 7 days, 15 days, and 30 days at 50 °C. ....                    | S9 |

\* Correspondence to Li Wang. E-mail: [opl\\_wl@zju.edu.cn](mailto:opl_wl@zju.edu.cn) and Haojie Yu. E-mail: [hjyu@zju.edu.cn](mailto:hjyu@zju.edu.cn)

Tel: +86-571-8795-3200; Fax: +86-571-8795-1612.

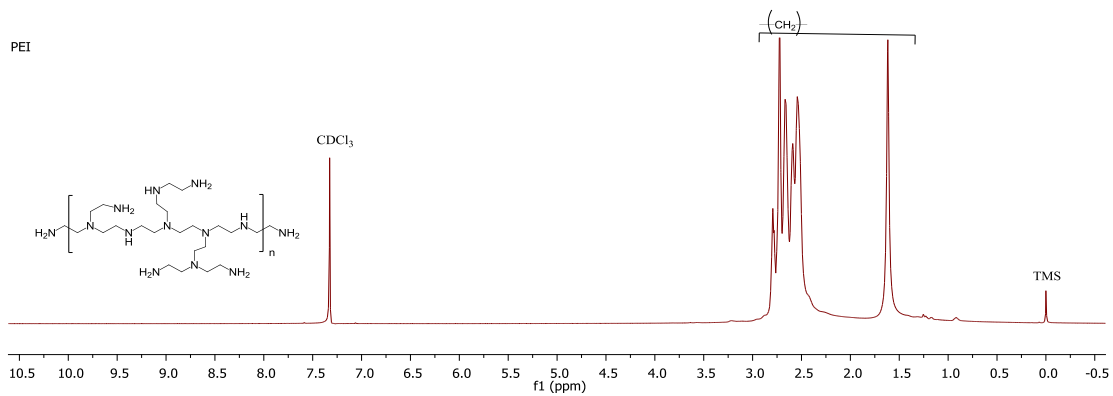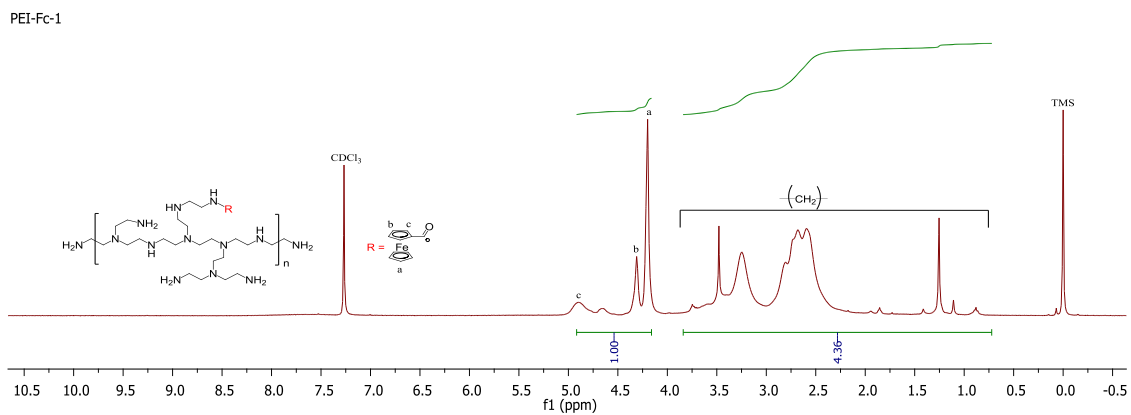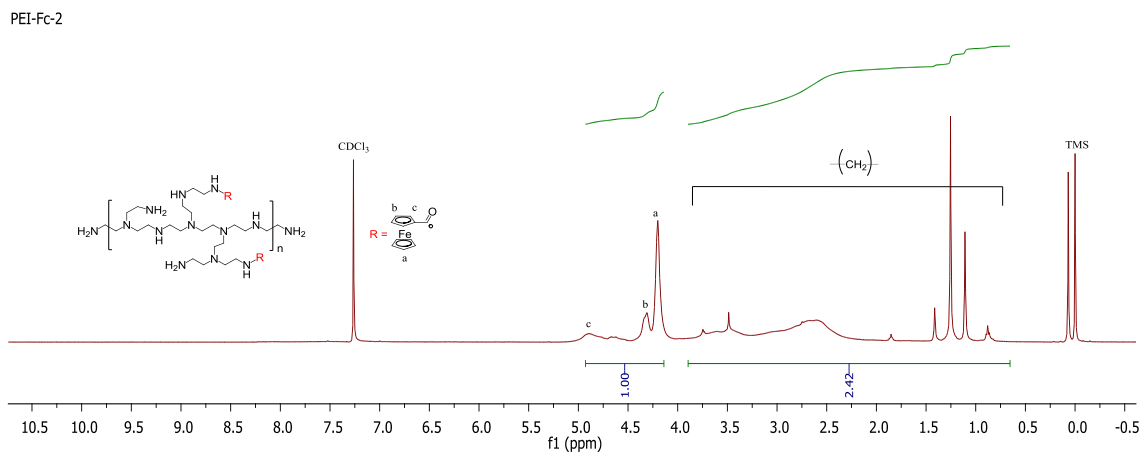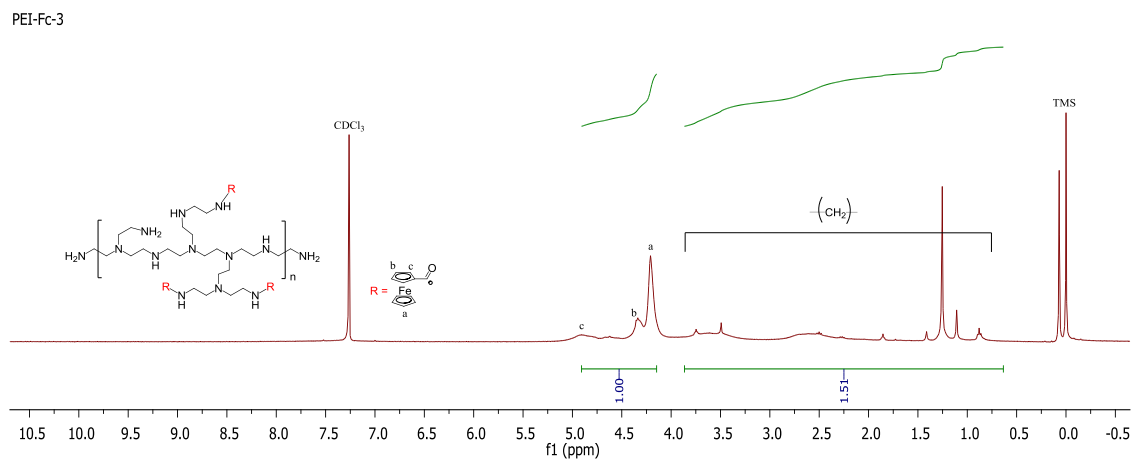

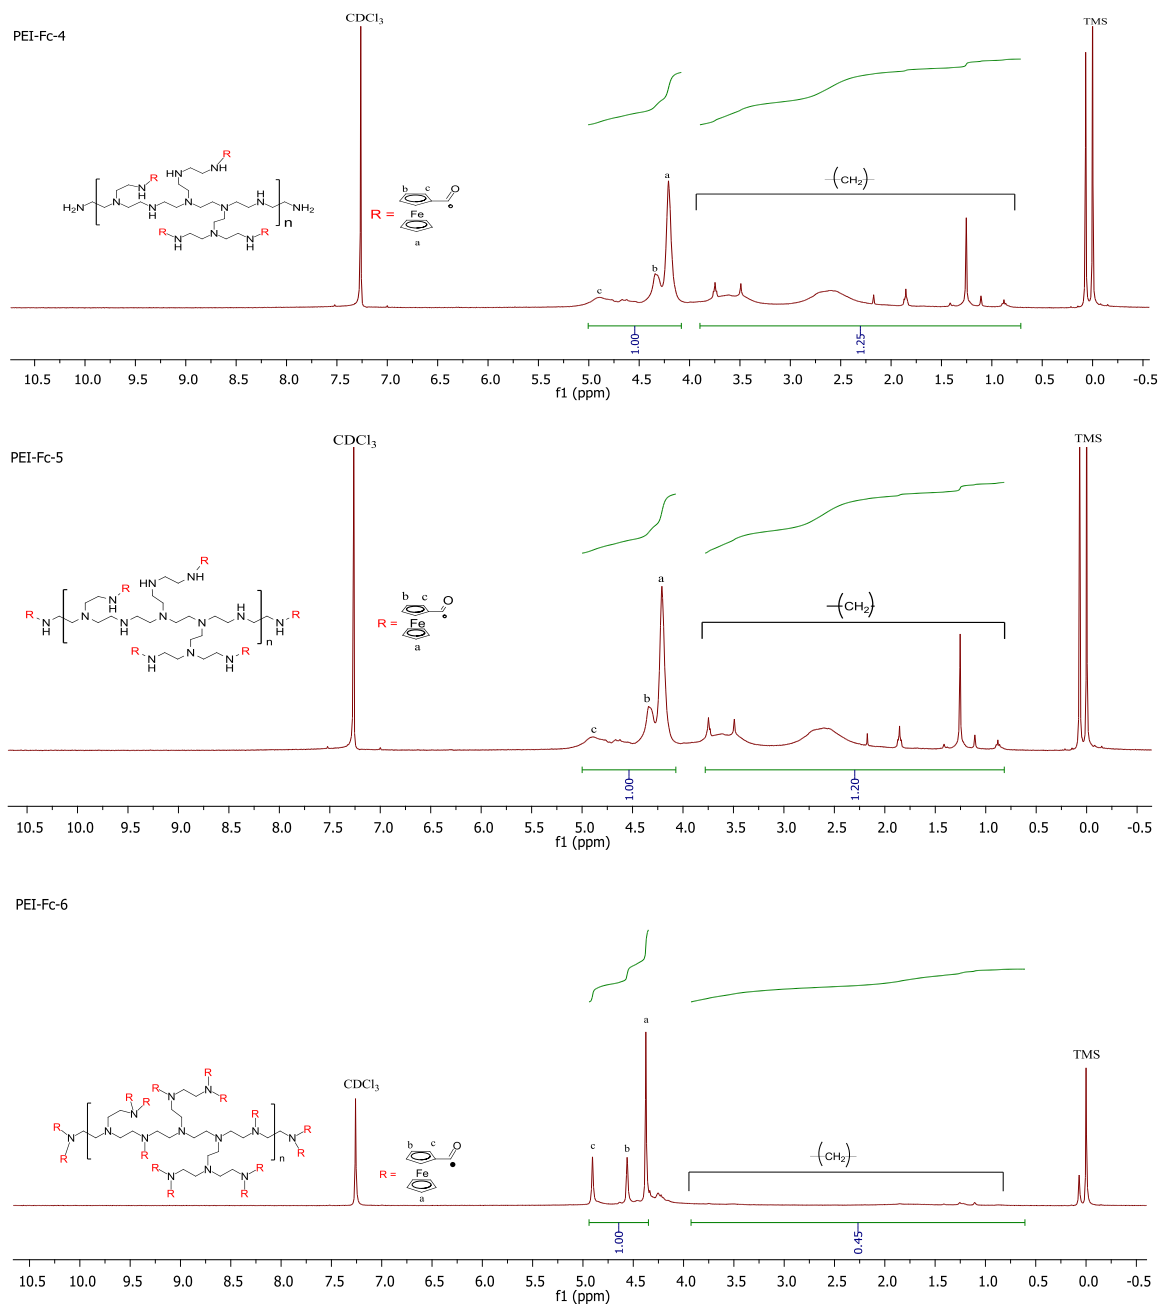

Figure S 1.  $^1\text{H}$  NMR spectra of PEI, and PEI-Fcs.

**Table S1. Experimental details for the synthesis of PEI-Fcs**

| Polymers  | Polyethyleneimine, branched (A) |       |                     | Ferrocenecarbonyl chloride (B) |       |                     | Mole ratio | THF | TEA |       | Time | Temperature |
|-----------|---------------------------------|-------|---------------------|--------------------------------|-------|---------------------|------------|-----|-----|-------|------|-------------|
|           | g                               | mmol  | mol.L <sup>-1</sup> | g                              | mmol  | mol.L <sup>-1</sup> | A : B      | mL  | mL  | mmol  | h    | °C          |
| PEI-Fc-1  | 4.65                            | 11.16 | 0.12                | 2.77                           | 11.16 | 0.12                | 1 : 1      | 90  | 1.6 | 11.74 | 18   | 25          |
| PEI-Fc-2  | 2.11                            | 5.06  | 0.07                | 2.51                           | 10.12 | 0.14                | 1 : 2      | 70  | 1.5 | 10.75 | 18   | 25          |
| PEI-Fc-3  | 1.55                            | 3.72  | 0.04                | 2.77                           | 11.16 | 0.12                | 1 : 3      | 90  | 1.6 | 11.74 | 18   | 25          |
| PEI-Fc-4  | 1.16                            | 2.79  | 0.03                | 2.77                           | 11.16 | 0.12                | 1 : 4      | 90  | 1.6 | 11.74 | 18   | 25          |
| PEI-Fc-5  | 0.93                            | 2.23  | 0.02                | 2.77                           | 11.16 | 0.12                | 1 : 5      | 90  | 1.6 | 11.74 | 18   | 25          |
| PEI-Fc-6* | 0.81                            | 1.95  | 0.02                | 9.70                           | 39.03 | 0.43                | 1 : 20     | 90  | 5.5 | 39.43 | 20   | 25          |

\* After stirring at 25 °C, the reaction mixture was refluxed for 5 h.

**Table S2. Relevant solvent parameters** <sup>[22]</sup>

| Solvent                         | DN   | AN   | $\epsilon$ | $\eta$ | $\mu$ (D) |
|---------------------------------|------|------|------------|--------|-----------|
| DMSO                            | 29.8 | 19.3 | 46.6       | 2      | 3.96      |
| DMF                             | 26.6 | 16   | 36.7       | 0.82   | 3.8       |
| THF                             | 20   | 8    | 7.6        | 0.55   | 1.75      |
| CH <sub>2</sub> Cl <sub>2</sub> | 0    | 20.4 | 9.1        | 0.44   | 1.8       |
| CHCl <sub>3</sub>               | 0    | 23.1 | 4.8        | 0.57   | 1.1       |

“DN” and “AN” are the donor and the acceptor numbers of the solvents. “ $\epsilon$ ” is the dielectric constant at 25 °C, reflecting the degree of solvent polarity. “ $\eta$ ” is the absolute viscosity at 25 °C, and “ $\mu$  (D)” is the dipolar moment in Debye.

**Table S3. Samples preparation for UV-Visible studies**

| Sample   | Amount of the sample |         | Solvent | Total volume of solution | Concentration |
|----------|----------------------|---------|---------|--------------------------|---------------|
|          | mg                   | mmol    |         | mL                       | mmol/L        |
| PEI-Fc-1 | 0.90                 | 0.00125 | DCM     | 25                       | 0.05          |
| PEI-Fc-2 | 1.10                 | 0.00125 | DCM     | 25                       | 0.05          |
| PEI-Fc-3 | 1.40                 | 0.00125 | DCM     | 25                       | 0.05          |
| PEI-Fc-4 | 1.70                 | 0.00125 | DCM     | 25                       | 0.05          |
| PEI-Fc-5 | 1.90                 | 0.00125 | DCM     | 25                       | 0.05          |
| PEI-Fc-6 | 3.50                 | 0.00125 | DCM     | 25                       | 0.05          |

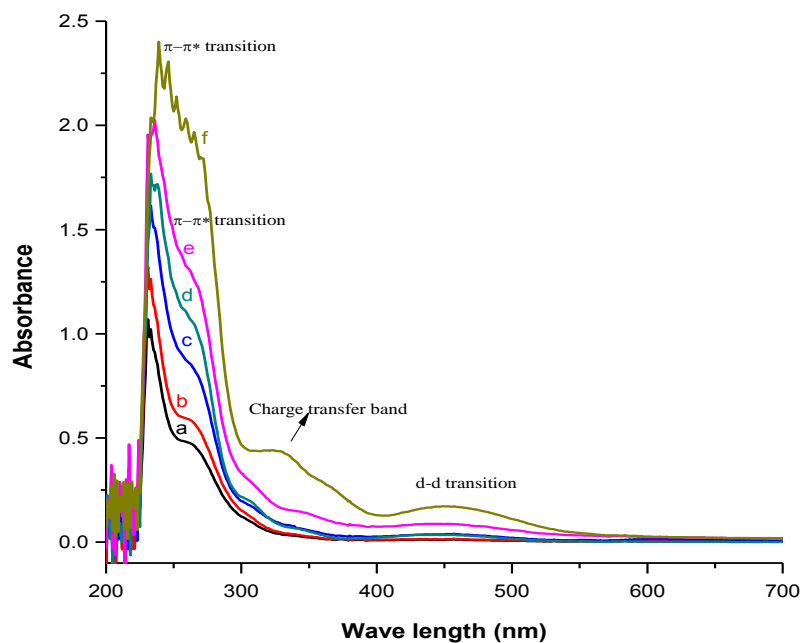

Figure S 2. UV-Vis spectra of PEI-Fcs: (a) PE-Fc-1, (b) PE-Fc-2, (c) PE-Fc-3, (d) PE-Fc-4, (e) PE-Fc-5 and (f) PE-Fc-6.

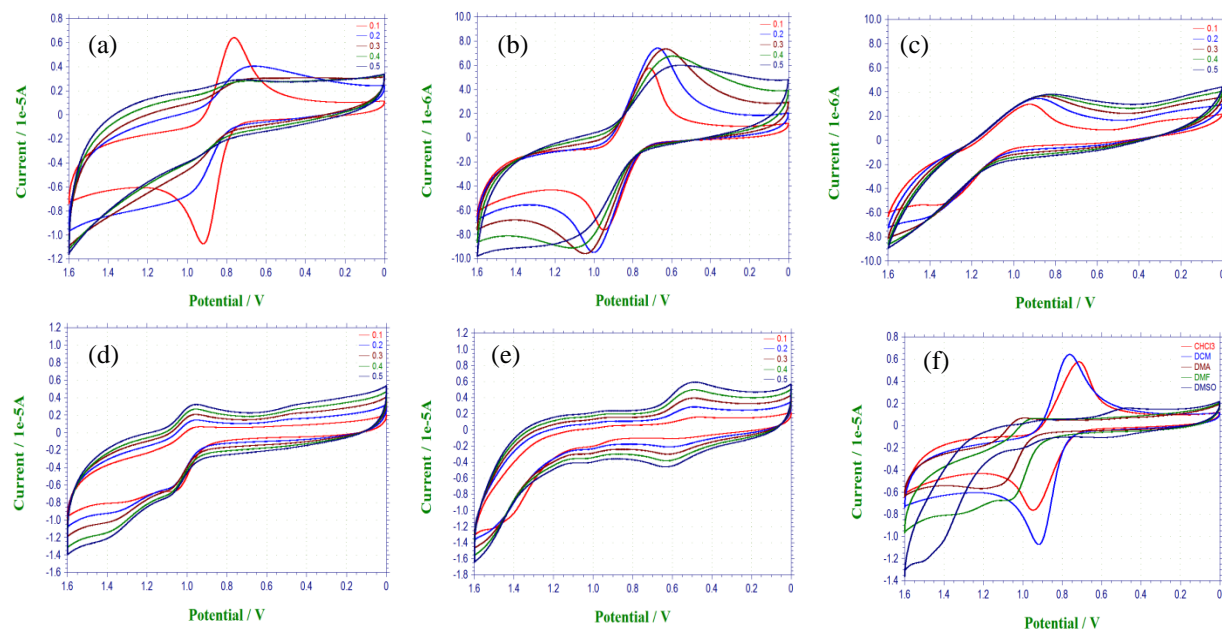

Figure S 3. CV curves of PEI-Fc-1 in: (a) DCM, (b)  $\text{CHCl}_3$ , (c) THF, (d) DMF, (e) DMSO at different scan rate (V/s), and (f) different organic solvents at 0.1 V/s

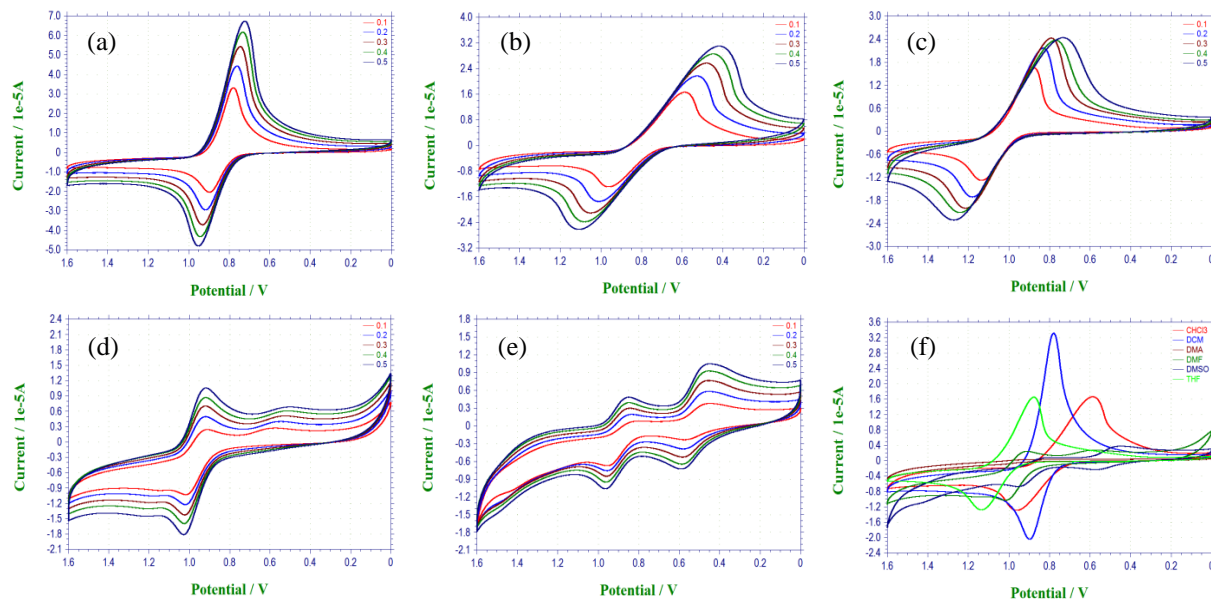

Figure S 4. CV curves of PEI-Fc-2 in: (a) DCM, (b)  $\text{CHCl}_3$ , (c) THF, (d) DMF, (e) DMSO at different scan rate (V/s), and (f) different organic solvents at 0.1 V/s

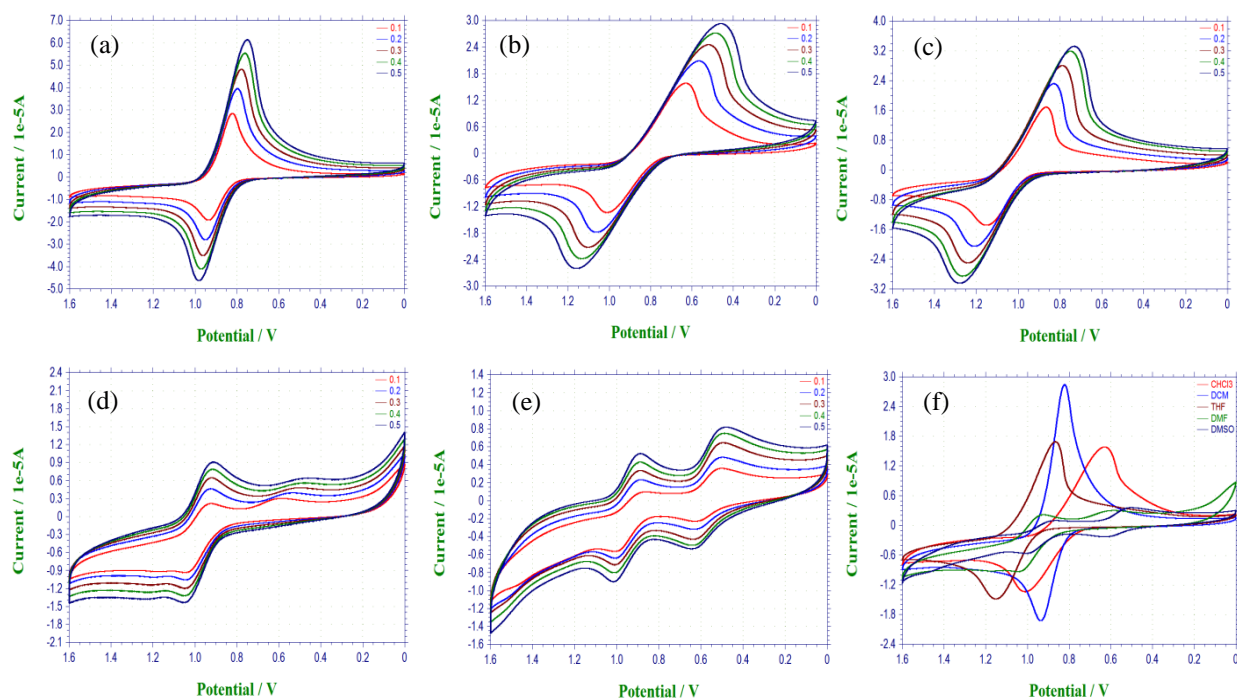

Figure S 5. CV curves of the PEI-Fc-3 in: (a) DCM, (b)  $\text{CHCl}_3$ , (c) THF, (d) DMF, (e) DMSO at different scan rate (V/s), and (f) different organic solvents at 0.1 V/s

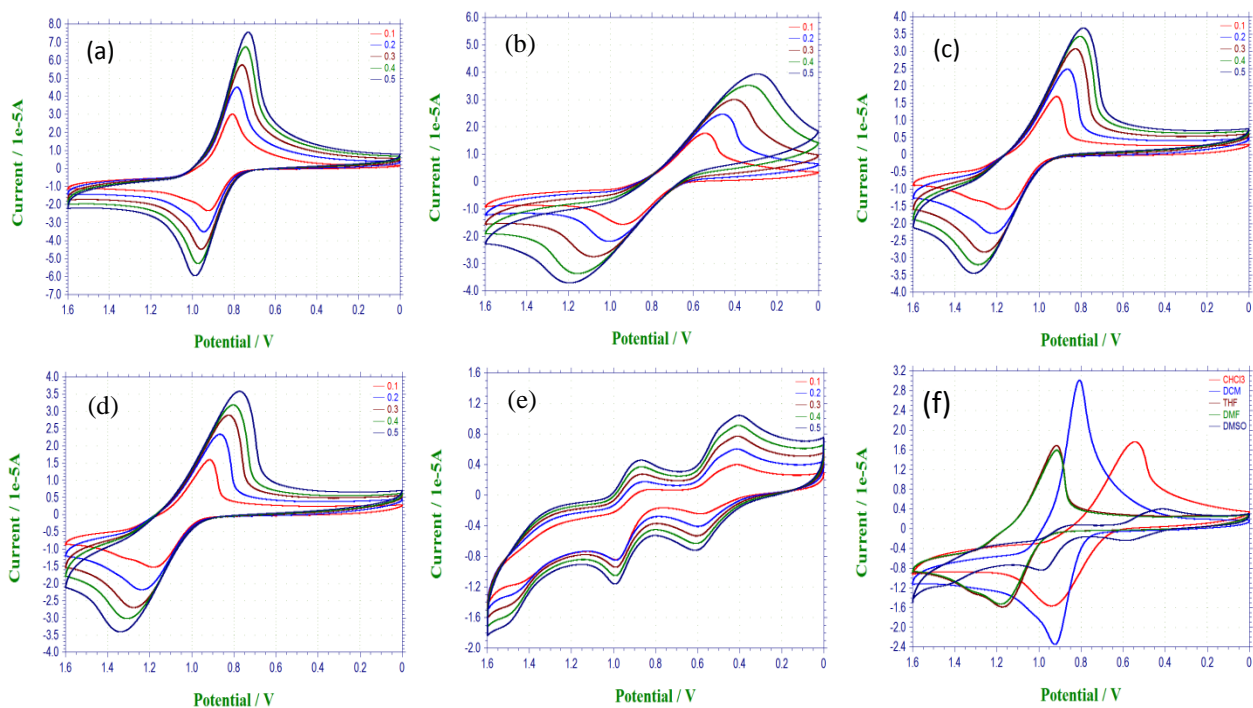

Figure S 6. CV curves of the PEI-Fc-4 in: (a) DCM, (b)  $\text{CHCl}_3$ , (c) THF, (d) DMF, (e) DMSO at different scan rate (V/s), and (f) different organic solvents at 0.1 V/s

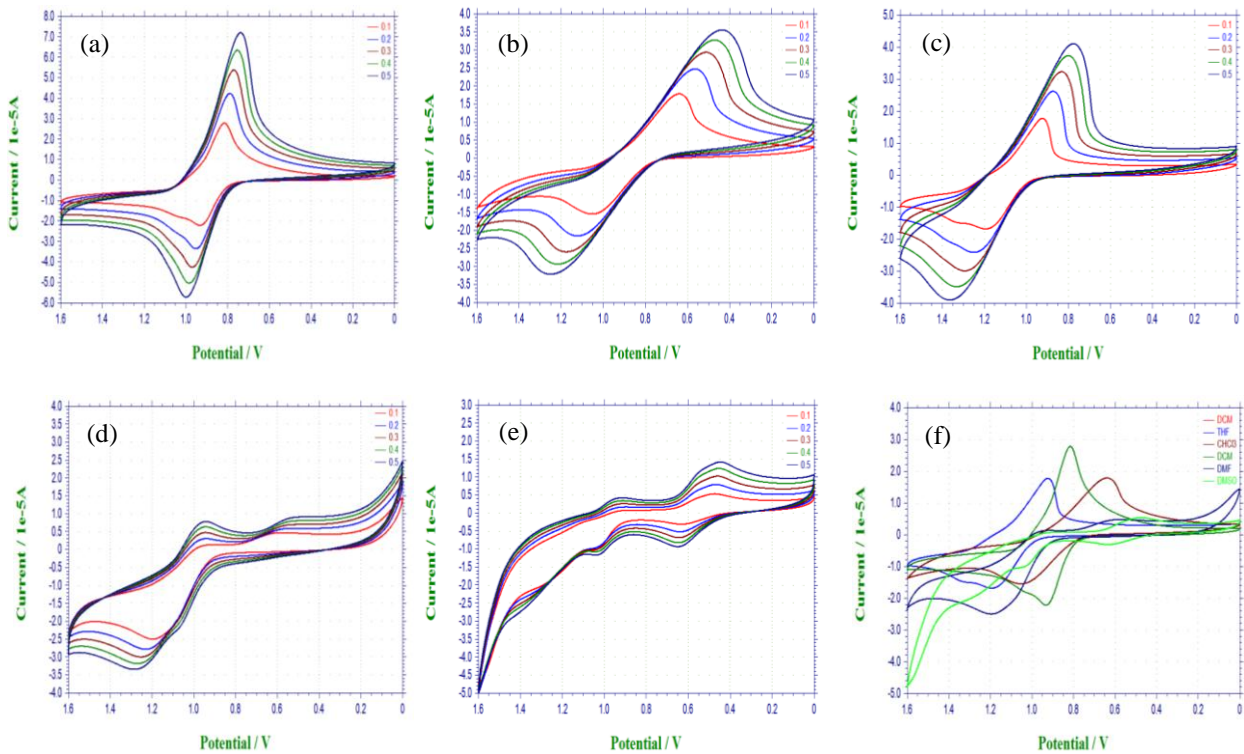

Figure S 7. CV curves of PEI-Fc-5 in: (a) DCM, (b)  $\text{CHCl}_3$ , (c) THF, (d) DMF, (e) DMSO at different scan rate (V/s), and (f) different organic solvents at 0.1 V/s



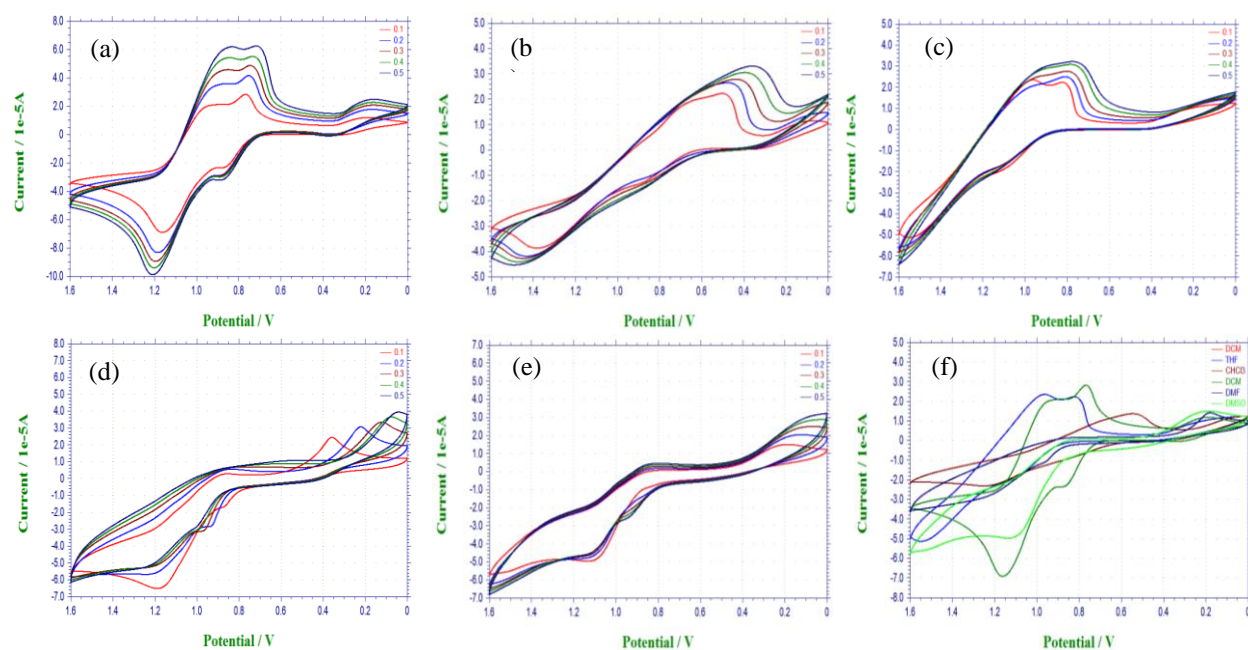

Figure S 8. CV curves of PEI-Fc-6 in: (a) DCM, (b)  $\text{CHCl}_3$ , (c) THF, (d) DMF, (e) DMSO at different scan rate (V/s), and (f) different organic solvents at 0.1 V/s

Table S4. Electrochemical data of PEI-Fcs in different organic solvents at 0.1 V/s

| Polymer  | Solvent         | $E_{PC}$<br>(V) | $E_{PA}$<br>(V) | $^a E_P^{1/2}$<br>(V) | $^b \Delta E_P$<br>(V) | $I_{PC}$<br>( $\mu\text{A}$ ) | $I_{PA}$<br>( $\mu\text{A}$ ) | $I_{PA}/I_{PC}$ |
|----------|-----------------|-----------------|-----------------|-----------------------|------------------------|-------------------------------|-------------------------------|-----------------|
| PEI-Fc-1 | DCM             | 0.764           | 0.918           | 0.841                 | 0.154                  | 6.853                         | 9.895                         | 1.444           |
|          | $\text{CHCl}_3$ | 0.715           | 0.948           | 0.832                 | 0.233                  | 6.405                         | 7.049                         | 1.101           |
|          | THF             | 0.928           | 1.345           | 1.137                 | 0.417                  | 0.185                         | 0.445                         | 2.408           |
|          | DMF             | 0.972           | 1.057           | 1.015                 | 0.085                  | 0.839                         | 5.300                         | 6.315           |
|          | DMSO            | 0.468           | 0.566           | 0.517                 | 0.098                  | 0.864                         | 0.345                         | 0.399           |
| PEI-Fc-2 | DCM             | 0.779           | 0.897           | 0.838                 | 0.118                  | 3.486                         | 1.949                         | 0.559           |
|          | $\text{CHCl}_3$ | 0.589           | 0.961           | 0.775                 | 0.372                  | 18.080                        | 12.250                        | 0.678           |
|          | THF             | 0.878           | 1.135           | 1.007                 | 0.257                  | 1.791                         | 1.215                         | 0.678           |
|          | DMF             | 0.912           | 1.017           | 0.965                 | 0.105                  | 4.544                         | 7.970                         | 1.754           |
|          | DMSO            | 0.799           | 0.956           | 0.878                 | 0.157                  | 2.151                         | 5.013                         | 2.331           |
| PEI-Fc-3 | DCM             | 0.822           | 0.936           | 0.879                 | 0.114                  | 29.580                        | 18.080                        | 0.611           |
|          | $\text{CHCl}_3$ | 0.632           | 1.010           | 0.821                 | 0.378                  | 17.750                        | 12.410                        | 0.699           |
|          | THF             | 0.867           | 1.151           | 1.009                 | 0.284                  | 18.030                        | 13.980                        | 0.775           |
|          | DMF             | 0.924           | 1.049           | 0.987                 | 0.125                  | 4.220                         | 6.514                         | 1.544           |
|          | DMSO            | 0.860           | 1.008           | 0.934                 | 0.148                  | 1.949                         | 3.893                         | 1.997           |
| PEI-Fc-4 | DCM             | 0.807           | 0.923           | 0.865                 | 0.116                  | 33.680                        | 21.920                        | 0.651           |
|          | $\text{CHCl}_3$ | 0.545           | 0.938           | 0.742                 | 0.393                  | 19.180                        | 14.770                        | 0.770           |
|          | THF             | 0.916           | 1.171           | 1.044                 | 0.255                  | 9.119                         | 14.710                        | 1.613           |
|          | DMF             | 0.916           | 1.181           | 1.049                 | 0.265                  | 8.552                         | 14.020                        | 1.639           |
|          | DMSO            | 0.818           | 0.987           | 0.903                 | 0.169                  | 2.370                         | 6.758                         | 2.851           |



|                 |                         |       |       |       |       |        |        |       |
|-----------------|-------------------------|-------|-------|-------|-------|--------|--------|-------|
| <b>PEI-Fc-5</b> | <b>DCM</b>              | 0.816 | 0.933 | 0.875 | 0.117 | 31.560 | 20.660 | 0.655 |
|                 | <b>CHCl<sub>3</sub></b> | 0.643 | 1.050 | 0.847 | 0.407 | 17.200 | 14.610 | 0.849 |
|                 | <b>THF</b>              | 0.924 | 1.192 | 1.058 | 0.268 | 7.770  | 15.740 | 2.026 |
|                 | <b>DMF</b>              | 0.964 | 1.194 | 1.079 | 0.230 | 6.673  | 22.740 | 3.408 |
|                 | <b>DMSO</b>             | 0.475 | 0.630 | 0.553 | 0.155 | 3.539  | 2.028  | 0.573 |

$${}^a E_P^{1/2} = (E_{PC} + E_{PA}) / 2; {}^b \Delta E_P = E_{PA} - E_{PC}$$

**Table S5. Electrochemical data of PEI-Fc-1 at different scan rate in different organic solvents**

| <b>Solvent</b>          | <b>Scan rate (V/s)</b> | $E_{PC}$ (V) | $E_{PA}$ (V) | $E_P^{1/2}$ (V) | $\Delta E_P$ (V) | $I_{PC}$ ( $\mu$ A) | $I_{PA}$ ( $\mu$ A) | $I_{PA}/I_{PC}$ |
|-------------------------|------------------------|--------------|--------------|-----------------|------------------|---------------------|---------------------|-----------------|
| <b>DCM</b>              | 0.1                    | 0.764        | 0.918        | 0.841           | 0.154            | 6.853               | 9.895               | 1.444           |
|                         | 0.2                    | 0.698        | 1.035        | 0.866           | 0.337            | 2.519               | 5.575               | 2.213           |
|                         | 0.3                    | 0.725        | 0.977        | 0.851           | 0.252            | 0.914               | 2.547               | 2.787           |
|                         | 0.4                    | 0.733        | 0.964        | 0.848           | 0.231            | 0.373               | 1.521               | 4.078           |
|                         | 0.5                    | 0.761        | 0.997        | 0.879           | 0.236            | 0.463               | 1.414               | 3.052           |
| <b>CHCl<sub>3</sub></b> | 0.1                    | 0.715        | 0.948        | 0.832           | 0.233            | 6.405               | 7.049               | 1.101           |
|                         | 0.2                    | 0.674        | 0.999        | 0.837           | 0.325            | 7.555               | 8.604               | 1.139           |
|                         | 0.3                    | 0.639        | 1.039        | 0.839           | 0.400            | 6.472               | 8.325               | 1.286           |
|                         | 0.4                    | 0.616        | 1.093        | 0.855           | 0.477            | 5.091               | 7.313               | 1.436           |
|                         | 0.5                    | 0.603        | 1.202        | 0.903           | 0.599            | 3.937               | 6.357               | 1.615           |
| <b>THF</b>              | 0.1                    | 0.928        | 1.345        | 1.137           | 0.417            | 0.185               | 0.445               | 2.408           |
|                         | 0.2                    | 0.884        | 1.404        | 1.144           | 0.520            | 1.118               | 5.078               | 4.542           |
|                         | 0.3                    | 0.865        | -            | -               | -                | 0.068               | -                   | -               |
|                         | 0.4                    | 0.837        | -            | -               | -                | 0.048               | -                   | -               |
|                         | 0.5                    | 0.855        | -            | -               | -                | 0.038               | -                   | -               |
| <b>DMF</b>              | 0.1                    | 0.972        | 1.057        | 1.015           | 0.085            | 0.839               | 5.300               | 6.315           |
|                         | 0.2                    | 0.975        | 1.087        | 1.031           | 0.112            | 1.371               | 4.594               | 3.351           |
|                         | 0.3                    | 0.975        | 1.085        | 1.030           | 0.110            | 1.745               | 4.249               | 2.435           |
|                         | 0.4                    | 0.968        | 1.094        | 1.031           | 0.126            | 2.040               | 4.304               | 2.110           |
|                         | 0.5                    | 0.970        | 1.103        | 1.037           | 0.133            | 2.099               | 4.232               | 2.016           |
| <b>DMSO</b>             | 0.1                    | 0.468        | 0.566        | 0.517           | 0.098            | 0.864               | 0.345               | 0.399           |
|                         | 0.2                    | 0.489        | 0.569        | 0.529           | 0.080            | 1.691               | 0.260               | 0.154           |
|                         | 0.3                    | 0.494        | 0.595        | 0.545           | 0.101            | 2.198               | 0.593               | 0.270           |
|                         | 0.4                    | 0.489        | 0.603        | 0.546           | 0.114            | 2.721               | 0.660               | 0.242           |
|                         | 0.5                    | 0.486        | 0.610        | 0.548           | 0.124            | 3.463               | 1.235               | 0.357           |

**Table S6. Electrochemical data of PEI-Fc-2 at different scan rate in different organic solvents**

| Solvent                 | Scan rate (V/s) | $E_{PC}$ (V) | $E_{PA}$ (V) | $E_P^{1/2}$ (V) | $\Delta E_P$ (V) | $I_{PC}$ ( $\mu$ A) | $I_{PA}$ ( $\mu$ A) | $I_{PA}/I_{PC}$ |
|-------------------------|-----------------|--------------|--------------|-----------------|------------------|---------------------|---------------------|-----------------|
| <b>DCM</b>              | 0.1             | 0.779        | 0.897        | 0.838           | 0.118            | 3.486               | 1.949               | 0.559           |
|                         | 0.2             | 0.761        | 0.916        | 0.839           | 0.155            | 4.556               | 2.823               | 0.620           |
|                         | 0.3             | 0.744        | 0.930        | 0.837           | 0.186            | 5.674               | 35.320              | 6.225           |
|                         | 0.4             | 0.734        | 0.941        | 0.838           | 0.207            | 63.870              | 41.143              | 0.644           |
|                         | 0.5             | 0.724        | 0.952        | 0.838           | 0.228            | 6.865               | 4.609               | 0.671           |
| <b>CHCl<sub>3</sub></b> | 0.1             | 0.589        | 0.961        | 0.775           | 0.372            | 18.080              | 12.250              | 0.678           |
|                         | 0.2             | 0.529        | 1.008        | 0.769           | 0.479            | 22.640              | 16.340              | 0.722           |
|                         | 0.3             | 0.479        | 1.048        | 0.764           | 0.569            | 27.310              | 19.460              | 0.713           |
|                         | 0.4             | 0.447        | 1.077        | 0.762           | 0.630            | 29.920              | 21.790              | 0.728           |
|                         | 0.5             | 0.418        | 1.106        | 0.762           | 0.688            | 31.550              | 23.600              | 0.748           |
| <b>THF</b>              | 0.1             | 0.878        | 1.135        | 1.007           | 0.257            | 1.791               | 1.215               | 0.678           |
|                         | 0.2             | 0.833        | 1.181        | 1.007           | 0.348            | 2.252               | 1.600               | 0.710           |
|                         | 0.3             | 0.796        | 1.212        | 1.004           | 0.416            | 2.406               | 1.880               | 0.781           |
|                         | 0.4             | 0.774        | 1.244        | 1.009           | 0.470            | 2.285               | 1.971               | 0.863           |
|                         | 0.5             | 0.743        | 1.272        | 1.008           | 0.529            | 2.256               | 2.120               | 0.940           |
| <b>DMF</b>              | 0.1             | 0.912        | 1.017        | 0.965           | 0.105            | 4.544               | 7.970               | 1.754           |
|                         | 0.2             | 0.921        | 1.019        | 0.970           | 0.098            | 6.393               | 10.400              | 1.627           |
|                         | 0.3             | 0.922        | 1.025        | 0.974           | 0.103            | 7.973               | 9.052               | 1.135           |
|                         | 0.4             | 0.922        | 1.026        | 0.974           | 0.104            | 9.168               | 11.540              | 1.259           |
|                         | 0.5             | 0.917        | 1.028        | 0.973           | 0.111            | 10.790              | 13.260              | 1.229           |
| <b>DMSO</b>             | 0.1             | 0.799        | 0.956        | 0.878           | 0.157            | 2.151               | 5.013               | 2.331           |
|                         | 0.2             | 0.833        | 0.956        | 0.895           | 0.123            | 2.935               | 4.845               | 1.651           |
|                         | 0.3             | 0.846        | 0.958        | 0.902           | 0.112            | 3.449               | 4.830               | 1.400           |
|                         | 0.4             | 0.849        | 0.962        | 0.906           | 0.113            | 3.887               | 4.992               | 1.284           |
|                         | 0.5             | 0.850        | 0.964        | 0.907           | 0.114            | 4.465               | 5.476               | 1.226           |

**Table S7. Electrochemical data of PEI-Fc-3 at different scan rate in different organic solvents**

| Solvent                 | Scan rate (V/s) | $E_{PC}$ (V) | $E_{PA}$ (V) | $E_P^{1/2}$ (V) | $\Delta E_P$ (V) | $I_{PC}$ ( $\mu$ A) | $I_{PA}$ ( $\mu$ A) | $I_{PA}/I_{PC}$ |
|-------------------------|-----------------|--------------|--------------|-----------------|------------------|---------------------|---------------------|-----------------|
| <b>DCM</b>              | 0.1             | 0.822        | 0.936        | 0.879           | 0.114            | 29.580              | 18.080              | 0.611           |
|                         | 0.2             | 0.799        | 0.951        | 0.875           | 0.152            | 40.900              | 25.910              | 0.633           |
|                         | 0.3             | 0.778        | 0.961        | 0.870           | 0.183            | 49.110              | 31.740              | 0.646           |
|                         | 0.4             | 0.762        | 0.971        | 0.867           | 0.209            | 56.370              | 39.040              | 0.693           |
|                         | 0.5             | 0.752        | 0.981        | 0.867           | 0.229            | 62.330              | 43.960              | 0.705           |
| <b>CHCl<sub>3</sub></b> | 0.1             | 0.632        | 1.010        | 0.821           | 0.378            | 17.750              | 12.410              | 0.699           |
|                         | 0.2             | 0.569        | 1.061        | 0.815           | 0.492            | 22.680              | 16.590              | 0.731           |
|                         | 0.3             | 0.521        | 1.102        | 0.812           | 0.581            | 25.920              | 19.630              | 0.757           |
|                         | 0.4             | 0.492        | 1.129        | 0.811           | 0.637            | 28.300              | 21.760              | 0.769           |
|                         | 0.5             | 0.464        | 1.153        | 0.809           | 0.689            | 13.100              | 23.160              | 1.768           |

|             |     |       |       |       |       |        |        |       |
|-------------|-----|-------|-------|-------|-------|--------|--------|-------|
| <b>THF</b>  | 0.1 | 0.867 | 1.151 | 1.009 | 0.284 | 18.030 | 13.980 | 0.775 |
|             | 0.2 | 0.833 | 1.207 | 1.020 | 0.374 | 23.660 | 19.130 | 0.809 |
|             | 0.3 | 0.791 | 1.240 | 1.016 | 0.449 | 28.300 | 23.210 | 0.820 |
|             | 0.4 | 0.752 | 1.260 | 1.006 | 0.508 | 31.900 | 26.340 | 0.826 |
|             | 0.5 | 0.739 | 1.276 | 1.008 | 0.537 | 31.790 | 28.420 | 0.894 |
| <b>DMF</b>  | 0.1 | 0.924 | 1.049 | 0.987 | 0.125 | 4.220  | 6.514  | 1.544 |
|             | 0.2 | 0.926 | 1.047 | 0.987 | 0.121 | 5.709  | 7.340  | 1.286 |
|             | 0.3 | 0.919 | 1.046 | 0.983 | 0.127 | 6.829  | 8.320  | 1.218 |
|             | 0.4 | 0.918 | 1.053 | 0.986 | 0.135 | 7.720  | 9.049  | 1.172 |
|             | 0.5 | 0.922 | 1.052 | 0.987 | 0.130 | 8.580  | 9.932  | 1.158 |
| <b>DMSO</b> | 0.1 | 0.860 | 1.008 | 0.934 | 0.148 | 1.949  | 3.893  | 1.997 |
|             | 0.2 | 0.885 | 1.007 | 0.946 | 0.122 | 2.868  | 3.980  | 1.388 |
|             | 0.3 | 0.892 | 1.007 | 0.950 | 0.115 | 3.283  | 3.806  | 1.159 |
|             | 0.4 | 0.888 | 1.011 | 0.950 | 0.123 | 3.806  | 4.119  | 1.082 |
|             | 0.5 | 0.888 | 1.016 | 0.952 | 0.128 | 4.455  | 4.698  | 1.055 |

**Table S8. Electrochemical data of PEI-Fc-4 at different scan rate in different organic solvents**

| <b>Solvent</b>          | <b>Scan rate (V/s)</b> | $E_{PC}$ (V) | $E_{PA}$ (V) | $E_P^{1/2}$ (V) | $\Delta E_P$ (V) | $I_{PC}$ ( $\mu A$ ) | $I_{PA}$ ( $\mu A$ ) | $I_{PA}/I_{PC}$ |
|-------------------------|------------------------|--------------|--------------|-----------------|------------------|----------------------|----------------------|-----------------|
| <b>DCM</b>              | 0.1                    | 0.807        | 0.923        | 0.865           | 0.116            | 33.680               | 21.920               | 0.651           |
|                         | 0.2                    | 0.785        | 0.945        | 0.865           | 0.160            | 48.190               | 33.170               | 0.688           |
|                         | 0.3                    | 0.760        | 0.958        | 0.859           | 0.198            | 60.040               | 12.480               | 0.208           |
|                         | 0.4                    | 0.744        | 0.973        | 0.859           | 0.229            | 68.460               | 50.110               | 0.732           |
|                         | 0.5                    | 0.731        | 0.987        | 0.859           | 0.256            | 77.720               | 56.300               | 0.724           |
| <b>CHCl<sub>3</sub></b> | 0.1                    | 0.545        | 0.938        | 0.742           | 0.393            | 19.180               | 14.770               | 0.770           |
|                         | 0.2                    | 0.465        | 0.997        | 0.731           | 0.532            | 26.340               | 20.140               | 0.765           |
|                         | 0.3                    | 0.407        | 1.066        | 0.737           | 0.659            | 31.190               | 25.290               | 0.811           |
|                         | 0.4                    | 0.348        | 1.143        | 0.746           | 0.795            | 35.920               | 29.160               | 0.812           |
|                         | 0.5                    | 0.306        | 1.169        | 0.738           | 0.863            | 39.000               | 30.340               | 0.778           |
| <b>THF</b>              | 0.1                    | 0.916        | 1.171        | 1.044           | 0.255            | 9.119                | 14.710               | 1.613           |
|                         | 0.2                    | 0.866        | 1.221        | 1.044           | 0.355            | 8.546                | 21.160               | 2.476           |
|                         | 0.3                    | 0.845        | 1.257        | 1.051           | 0.412            | 14.210               | 26.340               | 1.854           |
|                         | 0.4                    | 0.798        | 1.284        | 1.041           | 0.486            | 14.170               | 29.270               | 2.066           |
|                         | 0.5                    | 0.781        | 1.311        | 1.046           | 0.530            | 16.800               | 31.820               | 1.894           |
| <b>DMF</b>              | 0.1                    | 0.916        | 1.181        | 1.049           | 0.265            | 8.552                | 14.020               | 1.639           |
|                         | 0.2                    | 0.866        | 1.234        | 1.050           | 0.368            | 7.047                | 20.010               | 2.840           |
|                         | 0.3                    | 0.816        | 1.276        | 1.046           | 0.460            | 12.700               | 25.170               | 1.982           |
|                         | 0.4                    | 0.796        | 1.306        | 1.051           | 0.510            | 12.540               | 27.240               | 2.172           |
|                         | 0.5                    | 0.764        | 1.339        | 1.052           | 0.575            | 15.640               | 31.560               | 2.018           |
| <b>DMSO</b>             | 0.1                    | 0.818        | 0.987        | 0.903           | 0.169            | 2.370                | 6.758                | 2.851           |
|                         | 0.2                    | 0.852        | 0.991        | 0.922           | 0.139            | 2.972                | 5.680                | 1.911           |
|                         | 0.3                    | 0.861        | 0.990        | 0.926           | 0.129            | 3.539                | 5.703                | 1.611           |

|  |     |       |       |       |       |       |       |       |
|--|-----|-------|-------|-------|-------|-------|-------|-------|
|  | 0.4 | 0.866 | 0.989 | 0.928 | 0.123 | 4.127 | 5.989 | 1.451 |
|  | 0.5 | 0.872 | 0.990 | 0.931 | 0.118 | 4.656 | 6.308 | 1.355 |

**Table S9. Electrochemical data of PEI-Fc-5 at different scan rate in different organic solvents**

| Solvent           | Scan rate (V/s) | $E_{PC}$ (V) | $E_{PA}$ (V) | $E_P^{1/2}$ (V) | $\Delta E_P$ (V) | $I_{PC}$ ( $\mu$ A) | $I_{PA}$ ( $\mu$ A) | $I_{PA}/I_{PC}$ |
|-------------------|-----------------|--------------|--------------|-----------------|------------------|---------------------|---------------------|-----------------|
| DCM               | 0.1             | 0.816        | 0.933        | 0.875           | 0.117            | 31.560              | 20.660              | 0.655           |
|                   | 0.2             | 0.791        | 0.952        | 0.872           | 0.161            | 65.120              | 31.800              | 0.488           |
|                   | 0.3             | 0.771        | 0.970        | 0.871           | 0.199            | 56.780              | 40.520              | 0.714           |
|                   | 0.4             | 0.755        | 0.985        | 0.870           | 0.230            | 45.020              | 48.050              | 1.067           |
|                   | 0.5             | 0.739        | 0.998        | 0.869           | 0.259            | 73.710              | 54.460              | 0.739           |
| CHCl <sub>3</sub> | 0.1             | 0.643        | 1.050        | 0.847           | 0.407            | 17.200              | 14.610              | 0.849           |
|                   | 0.2             | 0.570        | 1.119        | 0.845           | 0.549            | 22.940              | 20.080              | 0.875           |
|                   | 0.3             | 0.522        | 1.167        | 0.845           | 0.645            | 28.260              | 24.000              | 0.849           |
|                   | 0.4             | 0.483        | 1.208        | 0.846           | 0.725            | 29.450              | 26.290              | 0.893           |
|                   | 0.5             | 0.446        | 0.239        | 0.343           | -0.207           | 32.440              | 28.840              | 0.889           |
| THF               | 0.1             | 0.924        | 1.192        | 1.058           | 0.268            | 7.770               | 15.740              | 2.026           |
|                   | 0.2             | 0.872        | 1.246        | 1.059           | 0.374            | 6.691               | 22.450              | 3.355           |
|                   | 0.3             | 0.829        | 1.288        | 1.059           | 0.459            | 11.050              | 27.870              | 2.522           |
|                   | 0.4             | 0.803        | 1.328        | 1.066           | 0.525            | 12.940              | 32.130              | 2.483           |
|                   | 0.5             | 0.772        | 1.361        | 1.066           | 0.589            | 14.130              | 35.890              | 2.540           |
| DMF               | 0.1             | 0.964        | 1.194        | 1.079           | 0.230            | 6.673               | 22.740              | 3.408           |
|                   | 0.2             | 0.965        | 1.229        | 1.097           | 0.264            | 7.073               | 23.830              | 3.369           |
|                   | 0.3             | 0.945        | 1.241        | 1.093           | 0.296            | 4.941               | 23.810              | 4.819           |
|                   | 0.4             | 0.946        | 1.257        | 1.102           | 0.311            | 6.074               | 24.080              | 3.964           |
|                   | 0.5             | 0.944        | 1.270        | 1.107           | 0.326            | 6.993               | 24.570              | 3.514           |
| DMSO              | 0.1             | 0.475        | 0.630        | 0.553           | 0.155            | 3.539               | 2.028               | 0.573           |
|                   | 0.2             | 0.466        | 0.639        | 0.553           | 0.173            | 6.333               | 3.237               | 0.511           |
|                   | 0.3             | 0.463        | 0.643        | 0.553           | 0.180            | 7.665               | 4.039               | 0.527           |
|                   | 0.4             | 0.452        | 0.649        | 0.551           | 0.197            | 9.292               | 4.672               | 0.503           |
|                   | 0.5             | 0.448        | 0.645        | 0.547           | 0.197            | 10.540              | 5.146               | 0.488           |

**Table S10. Samples preparation for CV studies**

| Sample   | Amount of the sample |       |        | Amount of electrolyte (Bu <sub>4</sub> NBF <sub>4</sub> ) |      |        | *Total volume of the solution |
|----------|----------------------|-------|--------|-----------------------------------------------------------|------|--------|-------------------------------|
|          | mg                   | mmol  | mmol/L | mg                                                        | mmol | mmol/L | mL                            |
| PEI-Fc-1 | 3.43                 | 0.005 | 0.50   | 329.27                                                    | 1.00 | 100    | 10                            |
| PEI-Fc-2 | 4.49                 | 0.005 | 0.50   | 329.27                                                    | 1.00 | 100    | 10                            |
| PEI-Fc-3 | 5.60                 | 0.005 | 0.50   | 329.27                                                    | 1.00 | 100    | 10                            |
| PEI-Fc-4 | 6.20                 | 0.005 | 0.50   | 329.27                                                    | 1.00 | 100    | 10                            |
| PEI-Fc-5 | 6.61                 | 0.005 | 0.50   | 329.27                                                    | 1.00 | 100    | 10                            |
| PEI-Fc-6 | 12.80                | 0.005 | 0.50   | 329.27                                                    | 1.00 | 100    | 10                            |

|                  |      |       |      |        |      |     |    |
|------------------|------|-------|------|--------|------|-----|----|
| <b>Ferrocene</b> | 2.00 | 0.005 | 0.50 | 329.27 | 1.00 | 100 | 10 |
|------------------|------|-------|------|--------|------|-----|----|

\*Solvents used for the preparation of solution were DCM, CHCl<sub>3</sub>, THF, DMF and DMSO, respectively.

**Table S11. Samples preparation for migration studies**

| Sample           | Ammonium perchlorate (AP) |       | BRC    |       | Hydroxyterminated polybutadiene (HTPB) |       | Isophorone diisocyanate |       |
|------------------|---------------------------|-------|--------|-------|----------------------------------------|-------|-------------------------|-------|
|                  | g                         | Wt. % | g      | Wt. % | g                                      | Wt. % | g                       | Wt. % |
| <b>Blank</b>     | 7.0535                    | 71.93 | -      | -     | 2.0873                                 | 21.28 | 0.6657                  | 6.79  |
| <b>Ferrocene</b> | 1.9183                    | 70.63 | 0.0814 | 3.00  | 0.5461                                 | 20.10 | 0.1701                  | 6.26  |
| <b>Catocene</b>  | 1.9152                    | 70.34 | 0.0899 | 3.30  | 0.5465                                 | 20.07 | 0.1711                  | 6.28  |
| <b>PEI-Fc-1</b>  | 1.9185                    | 70.69 | 0.0817 | 3.01  | 0.5438                                 | 20.04 | 0.1699                  | 6.26  |
| <b>PEI-Fc-4</b>  | 1.9194                    | 70.62 | 0.0818 | 3.01  | 0.5474                                 | 20.14 | 0.1693                  | 6.23  |
| <b>PEI-Fc-6</b>  | 1.9162                    | 70.66 | 0.0815 | 3.00  | 0.5443                                 | 20.07 | 0.1699                  | 6.26  |

**Table S12. Samples preparation for TG and DTG analysis**

| Sample No. | Sample Code             | Amount of PEI-Fcs (mg) | Amount of AP (mg) | Total amount (mg) | Wt.% of the PEI-Fcs | Amount of the sample used (mg) |
|------------|-------------------------|------------------------|-------------------|-------------------|---------------------|--------------------------------|
| 1          | AP                      | -                      | 3.0               | 3.0               | -                   | 3.0                            |
| 2          | AP + 5 Wt.% of PEI-Fc-1 | 2.0                    | 38.0              | 40                | 5                   | 2.95                           |
| 3          | AP + 5 Wt.% of PEI-Fc-2 | 2.0                    | 38.0              | 40                | 5                   | 2.80                           |
| 4          | AP + 5 Wt.% of PEI-Fc-3 | 2.0                    | 38.0              | 40                | 5                   | 2.85                           |
| 5          | AP + 5 Wt.% of PEI-Fc-4 | 2.0                    | 38.0              | 40                | 5                   | 3.00                           |
| 6          | AP + 5 Wt.% of PEI-Fc-5 | 2.0                    | 38.0              | 40                | 5                   | 2.69                           |
| 7          | AP + 5 Wt.% of PEI-Fc-6 | 2.0                    | 38.0              | 40                | 5                   | 2.95                           |
| 8          | AP + 1 Wt.% of PEI-Fc-6 | 0.5                    | 49.5              | 50                | 1                   | 2.70                           |
| 9          | AP + 2 Wt.% of PEI-Fc-6 | 0.6                    | 29.4              | 30                | 2                   | 2.83                           |
| 10         | AP + 3 Wt.% of PEI-Fc-6 | 0.9                    | 29.1              | 30                | 3                   | 2.84                           |
| 11         | AP + 4 Wt.% of PEI-Fc-6 | 1.2                    | 28.8              | 30                | 4                   | 2.85                           |
| 12         | AP + 5 Wt.% of PEI-Fc-6 | 2.0                    | 38.0              | 40                | 5                   | 2.97                           |

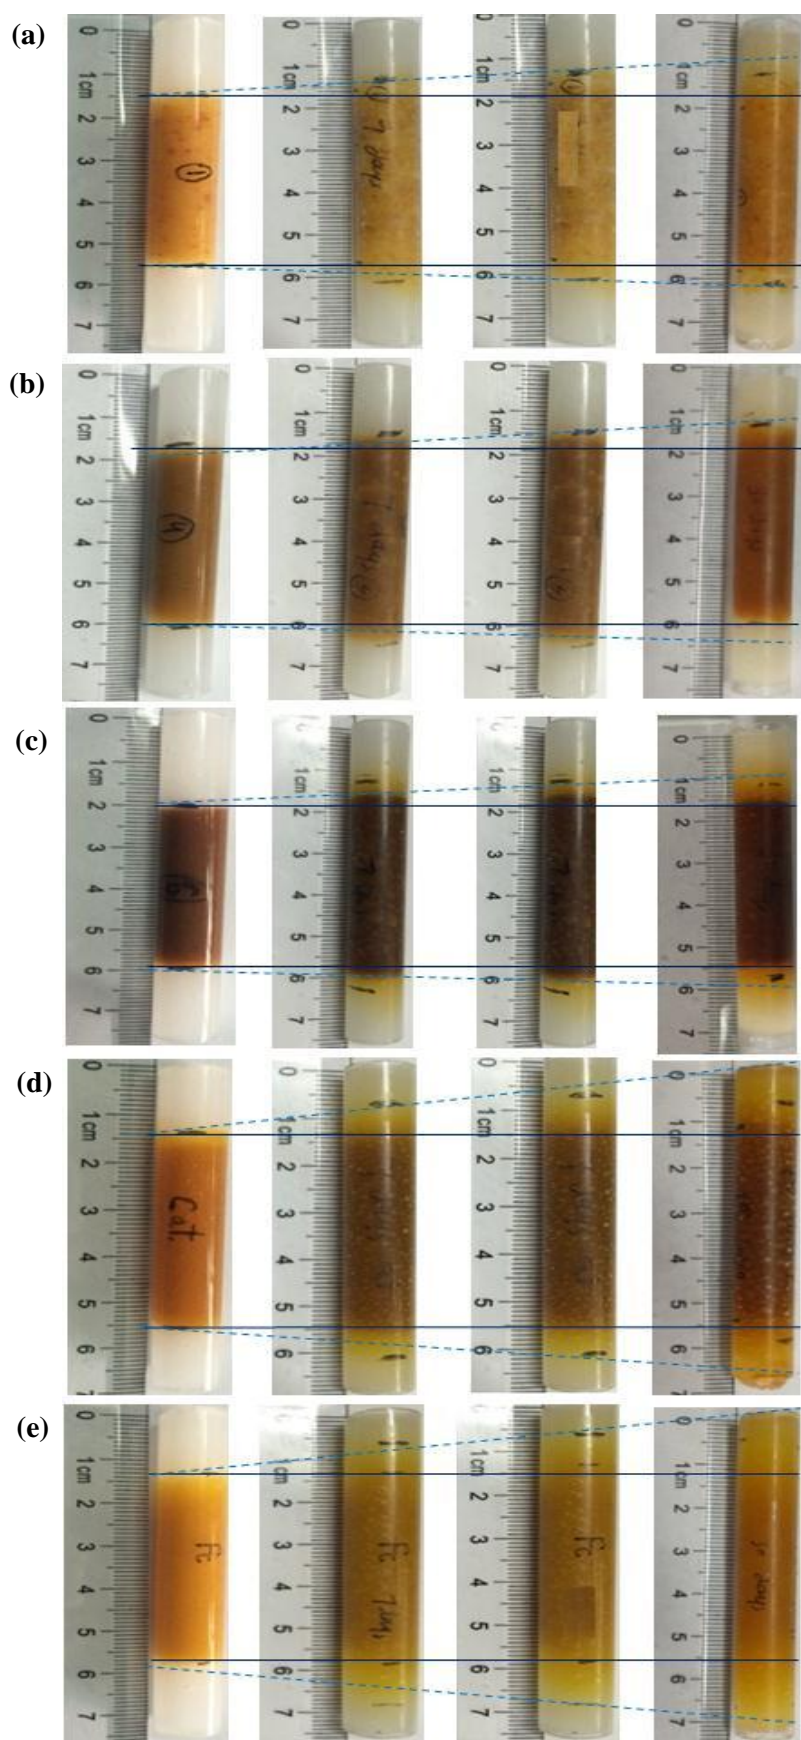

Figure S 9. Migration photos of: (a) PEI-Fc-1, (b) PEI-Fc-4, (c) PEI-Fc-6, (d) catocene and (e) ferrocene on first day, 7 days, 15 days, and 30 days at 50 °C.
